# Supplementary material for: Impact of an interdisciplinary malnutrition quality improvement project at a large metropolitan hospital
Source: PubMed Central journal article supplement — BMJ Open Qual. 2020 Mar 24;9(1):e000735. doi: 10.1136/bmjoq-2019-000735 (PMC7170540; doi:10.1136/bmjoq-2019-000735), 2020-03-24
Supplement: bmjoq-2019-000735supp001.pdf [file bmjoq-2019-000735supp001.pdf]

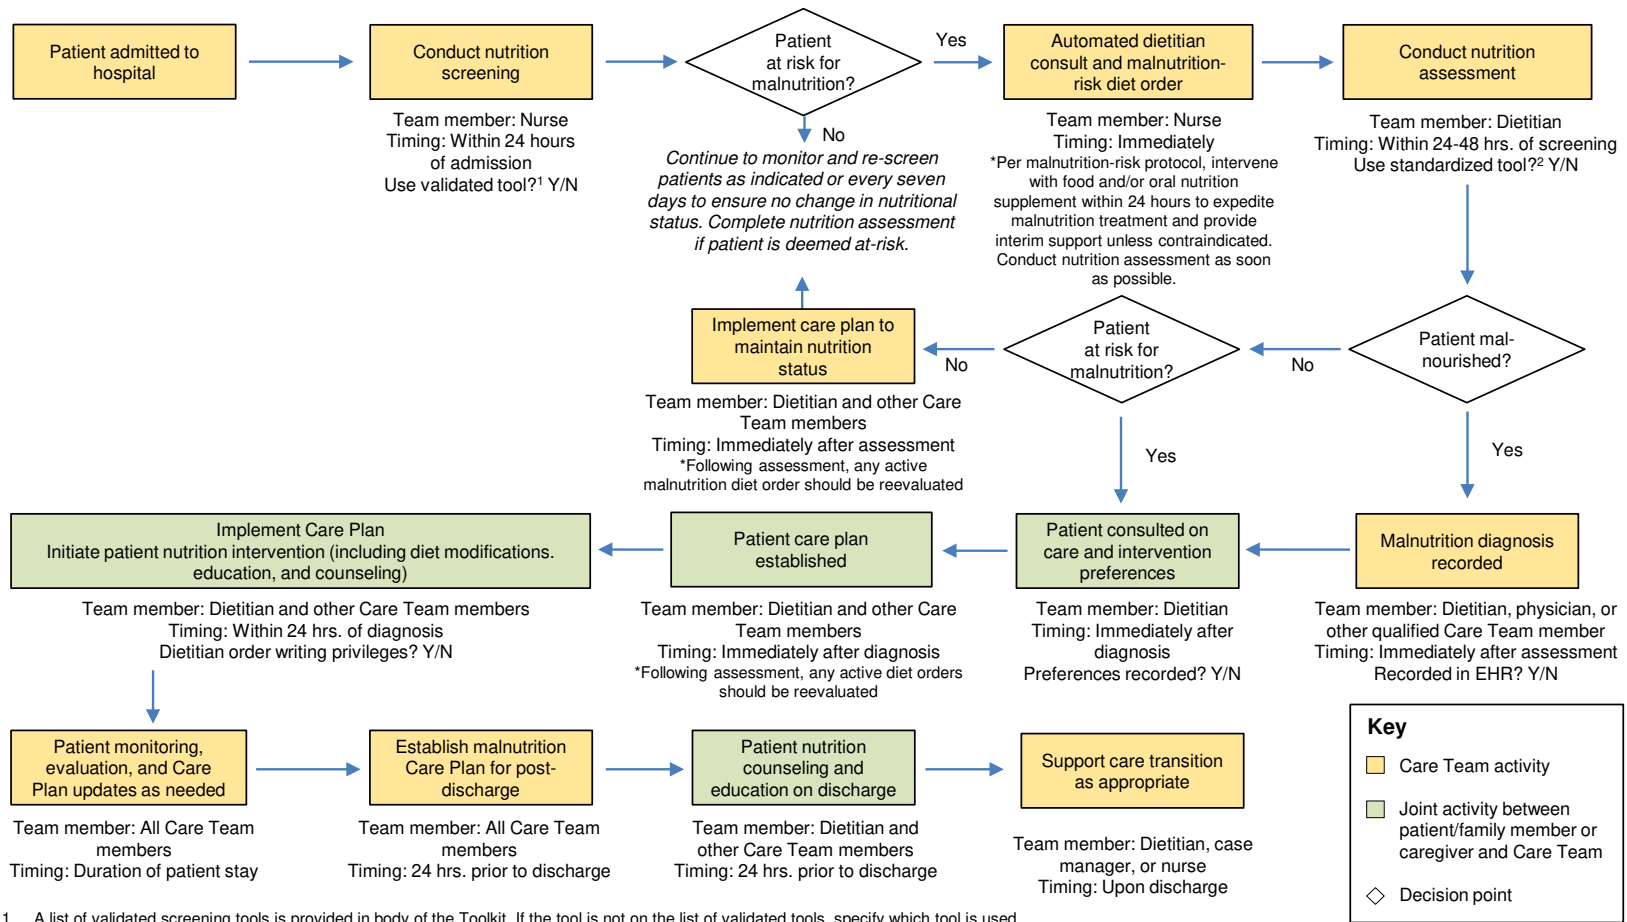

1. A list of validated screening tools is provided in body of the Toolkit. If the tool is not on the list of validated tools, specify which tool is used.  
 2. A list of standardized assessment tools is provided in body of the Toolkit. If the tool is not on the list of standardized tools, specify which tool is used.
