# Supplementary material for: Impact of an interdisciplinary malnutrition quality improvement project at a large metropolitan hospital
Source: PubMed Central journal article supplement — BMJ Open Qual. 2020 Mar 24;9(1):e000735. doi: 10.1136/bmjoq-2019-000735 (PMC7170540; doi:10.1136/bmjoq-2019-000735), 2020-03-24
Supplement: bmjoq-2019-000735supp002.pdf [file bmjoq-2019-000735supp002.pdf]

**Figure 2: Malnutrition QI Activities Adopted by the Hospital Across the Pre-Admission, Inpatient, and Post-Discharge Care Continuum**

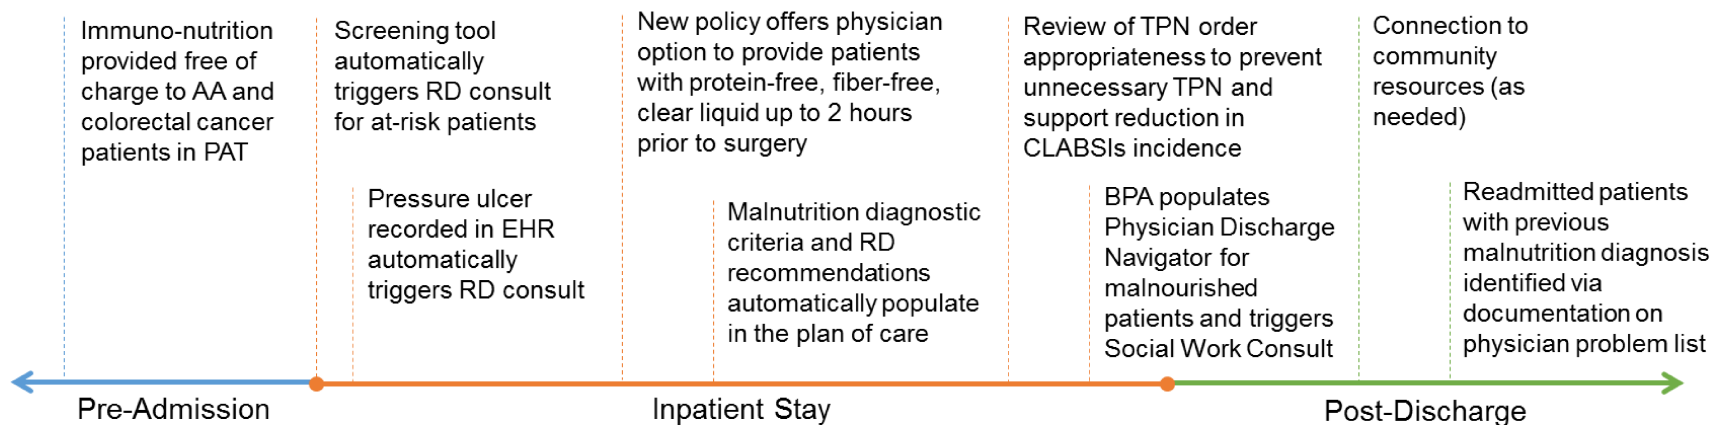

AA: Aortic aneurysm; PAT: Pre-admission testing; RD: Registered dietitian; EHR: Electronic health record; NPO: "Nil per os" (nothing by mouth); TPN: Total parenteral nutrition; CLABSI: Central-Line Associated Bloodstream Infections; BPA: Best Practice Alert
